# Supplementary material
Source: publisher site journal article supplement (https://www.dovepress.com/article/525359)
Supplement: Supplementary file 1 [file Supplemental%20Tables_1.docx]

Supplemental Table 1. Outcome measurement scores and difference between baseline and end of the study (week 9)

|  | **Baseline** | **End of study**  **(Week 9)** | **Change from baseline** | **95% CI** |
| --- | --- | --- | --- | --- |
| VAS for pain at movement | 64.5 ± 10.6 | 25.9 ± 18.9 | -38.6 ± 21.2 | -42.3 to -34.9 |
| VAS for pain at rest | 52.3 ± 16.7 | 20.4 ± 18.8 | -31.9 ± 22.1 | -35.8 to -28.1 |
| NPQ | 40.2 ± 10.5 | 20.2 ± 13.8 | -20.0 ± 14.1 | -22.5 to -17.5 |
| NDI | 32.3 ± 10.7 | 16.0 ± 11.2 | -16.3 ± 12.9 | -18.6 to -14.1 |
| EQ-5D-5L | 0.76 ± 0.10 | 0.84 ± 0.09 | 0.08 ± 0.11 | 0.06 to 0.10 |
| PCS | 44.6 ± 6.6 | 49.3 ± 7.1 | 4.8 ± 7.2 | 3.5 to 6.0 |
| MCS | 46.5 ± 10.3 | 51.2 ± 8.3 | 4.7 ± 9.4 | 3.1 to 6.3 |

CI: Confidence Interval; NRS: Numeric Rating Scale; JFLS: Jaw Functional Limitation Scale; MMO: Maximum Mouth Opening; EQ-5D-5L: EuroQol 5-dimension 5-level; PCS: Physical Component Summary; MCS: Mental Component Summary

Supplemental Table 2. – 1. Estimated MCID and SCB by sex

|  | **Female** | | | | **Male** | | | |
| --- | --- | --- | --- | --- | --- | --- | --- | --- |
|  | **Threshold** | **Specificity** | **Sensitivity** | **AUC** | **Threshold** | **Specificity** | **Sensitivity** | **AUC** |
| ***MCID*** |  |  |  |  |  |  |  |  |
| VAS for pain at movement | -22.8 | 0.85 | 0.82 | 0.89 (0.76 - 0.99)* | -19.5 | 0.86 | 0.96 | 0.89 (0.74 - 0.97)* |
| VAS for pain at rest | -17.5 | 0.82 | 0.76 | 0.80 (0.63 - 0.95)* | -14.1 | 0.80 | 0.97 | 0.88 (0.70 - 0.97)* |
| NPQ | -19.1 | 0.54 | 0.89 | 0.67 (0.51 - 0.81) | -10.0 | 0.88 | 0.97 | 0.92 (0.74 - 0.99)* |
| NDI | -18.6 | 0.43 | 0.94 | 0.71 (0.42 - 0.86) | -9.5 | 0.82 | 0.98 | 0.88 (0.70 - 0.97)* |
| EQ-5D-5L | 0.01 | 0.69 | 0.62 | 0.64 (0.45 - 0.83) | 0.07 | 0.50 | 1.00 | 0.71 (0.41 - 0.87) |
| PCS | 0.9 | 0.74 | 0.89 | 0.81 (0.67 - 0.92)* | 2.1 | 0.73 | 0.97 | 0.87 (0.69 - 0.97)* |
| MCS | 3.4 | 0.53 | 0.78 | 0.59 (0.45 - 0.75) | 4.1 | 0.52 | 0.71 | 0.55 (0.45 - 0.75) |
| ***SCB*** |  |  |  |  |  |  |  |  |
| VAS for pain at movement | -32.9 | 0.90 | 0.64 | 0.82 (0.72 - 0.91)* | -41.0 | 0.74 | 0.81 | 0.86 (0.75 - 0.94)* |
| VAS for pain at rest | -38.0 | 0.75 | 0.79 | 0.81 (0.70 - 0.90)* | -23.8 | 0.79 | 0.71 | 0.78 (0.63 - 0.91)* |
| NPQ | -19.2 | 0.74 | 0.76 | 0.78 (0.67 - 0.88)* | -20.1 | 0.93 | 0.90 | 0.96 (0.87 - 1.00)* |
| NDI | -20.9 | 0.57 | 0.90 | 0.77 (0.65 - 0.87)* | -14.0 | 0.98 | 0.83 | 0.94 (0.84 - 1.00)* |
| EQ-5D-5L | 0.01 | 0.89 | 0.53 | 0.72 (0.58 - 0.83)* | 0.06 | 0.65 | 0.79 | 0.71 (0.56 - 0.85)* |
| PCS | 6.1 | 0.56 | 0.82 | 0.66 (0.45 - 0.78) | 6.0 | 0.69 | 0.89 | 0.84 (0.72 - 0.94)* |
| MCS | 3.4 | 0.67 | 0.67 | 0.67 (0.54 - 0.79) | 6.0 | 0.33 | 0.83 | 0.52 (0.45 - 0.70) |

The threshold for MCID and SCB was estimated with receiver operating characteristic (ROC) curve. AUC was presented with 95% confidence interval. MCID: Minimal Clinically Important Difference; SCB: Substantial Clinical Benefit; AUC: Area Under the Curve; VAS: Visual Analogue Scale; NPQ: Northwick Park Neck Pain Questionnaire; NDI: Neck Disability Index; EQ-5D-5L: EuroQoL 5-Dimension 5-Level; PCS: Physical Component Summary; MCS: Mental Component Summary

* AUC’s point estimate> 0.7 or higher, and confidence interval’s lower bound > 0.5 or higher

Supplemental Table 2. – 2. Estimated MCID and SCB by ages

|  | **Age ≥ 40** | | | | **Age < 40** | | | |
| --- | --- | --- | --- | --- | --- | --- | --- | --- |
|  | **Threshold** | **Specificity** | **Sensitivity** | **AUC** | **Threshold** | **Specificity** | **Sensitivity** | **AUC** |
| ***MCID*** |  |  |  |  |  |  |  |  |
| VAS for pain at movement | -21.4 | 0.88 | 0.96 | 0.92 (0.71 - 0.99)* | -20.0 | 0.84 | 0.83 | 0.87 (0.75 - 0.96)* |
| VAS for pain at rest | -18.6 | 0.82 | 0.96 | 0.88 (0.67 - 0.97)* | -10.0 | 0.84 | 0.74 | 0.80 (0.65 - 0.93)* |
| NPQ | -14.5 | 0.65 | 0.98 | 0.77 (0.57 - 0.92)* | -13.5 | 0.77 | 0.84 | 0.82 (0.68 - 0.92)* |
| NDI | -7.0 | 0.78 | 0.96 | 0.84 (0.57 - 0.95)* | -11.6 | 0.69 | 0.75 | 0.77 (0.63 - 0.88)* |
| EQ-5D-5L | 0.02 | 0.69 | 0.78 | 0.69 (0.40 - 0.90) | 0.04 | 0.63 | 0.68 | 0.64 (0.45 - 0.81) |
| PCS | 1.1 | 0.71 | 0.97 | 0.80 (0.57 - 0.97)* | 2.5 | 0.77 | 0.92 | 0.89 (0.78 - 0.97)* |
| MCS | 4.3 | 0.57 | 0.99 | 0.71 (0.46 - 0.89) | 3.3 | 0.48 | 0.67 | 0.49 (0.43 - 0.70) |
| ***SCB*** |  |  |  |  |  |  |  |  |
| VAS for pain at movement | -43.0 | 0.74 | 0.74 | 0.80 (0.67 - 0.90)* | -26.5 | 0.96 | 0.64 | 0.87 (0.78 - 0.94)* |
| VAS for pain at rest | -43.2 | 0.60 | 0.79 | 0.72 (0.59 - 0.84)* | -25.5 | 0.82 | 0.78 | 0.84 (0.73 - 0.94)* |
| NPQ | -19.7 | 0.70 | 0.76 | 0.76 (0.64 - 0.88)* | -20.9 | 0.99 | 0.85 | 0.95 (0.88 - 0.99)* |
| NDI | -18.5 | 0.59 | 0.81 | 0.74 (0.62 - 0.86)* | -14.1 | 0.98 | 0.77 | 0.94 (0.86 - 0.99)* |
| EQ-5D-5L | 0.01 | 0.91 | 0.31 | 0.59 (0.42 - 0.74) | 0.07 | 0.70 | 0.85 | 0.81 (0.69 - 0.91)* |
| PCS | 5.6 | 0.55 | 0.88 | 0.69 (0.43 - 0.81) | 7.6 | 0.70 | 0.85 | 0.80 (0.68 - 0.91)* |
| MCS | 7.8 | 0.52 | 0.79 | 0.64 (0.49 - 0.78) | 4.3 | 0.48 | 0.71 | 0.57 (0.46 - 0.71) |

The threshold for MCID and SCB was estimated with receiver operating characteristic (ROC) curve. AUC was presented with 95% confidence interval. MCID: Minimal Clinically Important Difference; SCB: Substantial Clinical Benefit; AUC: Area Under the Curve; VAS: Visual Analogue Scale; NPQ: Northwick Park Neck Pain Questionnaire; NDI: Neck Disability Index; EQ-5D-5L: EuroQoL 5-Dimension 5-Level; PCS: Physical Component Summary; MCS: Mental Component Summary

* AUC’s point estimate> 0.7 or higher, and confidence interval’s lower bound > 0.5 or higher

Supplemental Table 3. SEM and MDC

|  | SEM | MDC |
| --- | --- | --- |
| VAS for pain at movement | 1.84 | 5.10 |
| VAS for pain at rest | 2.90 | 8.03 |
| NPQ | 4.35 | 12.05 |
| NDI | 2.83 | 7.84 |
| EQ-5D-5L | 0.05 | 0.13 |
| PCS | 3.43 | 9.49 |
| MCS | 6.18 | 17.12 |

SEM: Standard Error of Measurement; MDC: Minimal Detectable Change; VAS: Visual Analogue Scale; NPQ: Northwick Park Neck Pain Questionnaire; NDI: Neck Disability Index; EQ-5D-5L: EuroQoL 5-Dimension 5-Level; PCS: Physical Component Summary; MCS: Mental Component Summary
